# Supplementary material for: DBP7 and YRF1-6 Are Involved in Cell Sensitivity to LiCl by Regulating the Translation of PGM2 mRNA
Source: MDPI journal article supplement (doi:10.3390/ijms24021785), 2023-01-16
Supplement: s1 [file s1]

# Supplementary Figures

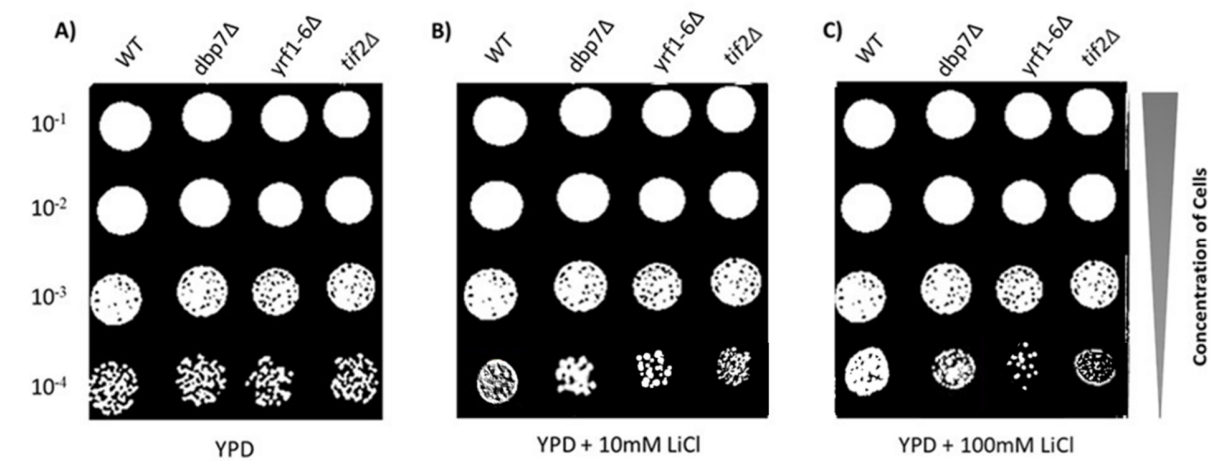

Figure S1. **LiCl sensitivity analysis for target strains in YPD media.** No increased *LiCl* sensitivity is observed for mutant strains *DBP7* and *YRF1-6* in media with glucose as the primary carbon source. Spot analysis is conducted with at least three replicates ( $n \geq 3$ ) with similar results.

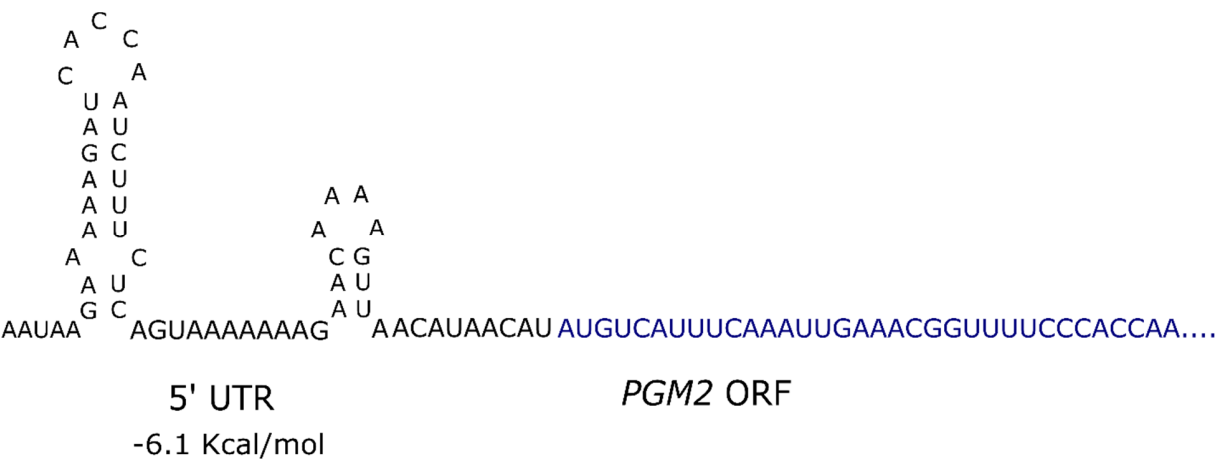

Figure S2. Complex secondary structure of the *PGM2* 5' UTR mRNA.

## Supplementary Table

**Table S1. List of mutant strains in gene expression and random arrays.**

| Genes found in the gene expression array |           | Genes found in the random array |           |
|------------------------------------------|-----------|---------------------------------|-----------|
| YLR085C                                  | YER069W   | YJL130C                         | YMR105C   |
| YER088C                                  | YDR496C   | YAL005C                         | YMR105C   |
| YPL086C                                  | YEL066W   | YAL017W                         | YMR105C   |
| YFL031W                                  | YER117W   | YAL036C                         | YMR119W-A |
| YMR172W                                  | YER027C   | YBL013W                         | YMR120C   |
| YOL012C                                  | YGL105W   | YBL066C                         | YMR121C   |
| YLR451W                                  | YGL236C   | YBR025C                         | YMR122C   |
| YGL035C                                  | YGR085C   | YBR031W                         | YMR123W   |
| YGL151W                                  | YGR084C   | YBR061C                         | YMR124W   |
| YGL013C                                  | YGL115W   | YBR101C                         | YMR126C   |
| YJL089W                                  | YGR118W   | YBR121C                         | YMR127C   |
| YMR179W                                  | YGR034W   | YBR146W                         | YMR129W   |
| YOR047C                                  | YGR027C   | YBR181C                         | YMR130W   |
| YGL162W                                  | YGL196W   | YBR187W                         | YMR132C   |
| YAL059W                                  | YGL195W   | YBR212W                         | YMR194W   |
| YKR059W                                  | YHR189W   | YBR294W                         | YMR207C   |
| YJL191W                                  | YHR075C   | YBR295W                         | YMR209C   |
| YLR287C-A                                | YGR201C   | YBR296C                         | YMR210W   |
| YNL162W                                  | YHL039W   | YBR297W                         | YMR214W   |
| YOL045W                                  | YHL033C   | YBR301W                         | YMR215W   |
| YFL034C-A                                | YIL038C   | YCL001W                         | YMR216C   |
| YNL069C                                  | YIL070C   | YCL001W-A                       | YMR219W   |
| YML068W                                  | YBR118W   | YCL002C                         | YMR221C   |
| YBL032W                                  | YDR477W   | YCL006C                         | YMR222C   |
| YGL248W                                  | YIL064W   | YCL028W                         | YMR223W   |
| YJL190C                                  | YJL136C   | YCL029C                         | YMR224C   |
| YMR012W                                  | YJR014W   | YCL037C                         | YMR256C   |
| YNL299W                                  | YIR038C   | YCR003W                         | YMR258C   |
| YFR032C-A                                | YJL162C   | YCR026C                         | YMR259C   |
| YDR447C                                  | YJR051W   | YCR027C                         | YMR261C   |
| YDL219W                                  | YJR094W-A | YCR028C-A                       | YMR262W   |
| YNL277W                                  | YIR001C   | YCR032W                         | YMR263W   |
| YDR378C                                  | YJL073W   | YCR033W                         | YMR264W   |
| YLR172C                                  | YLR012C   | YCR034W                         | YMR265C   |
| YPL090C                                  | YKL185W   | YCR036W                         | YMR266W   |
| YDR450W                                  | YKL202W   | YCR037C                         | YMR269W   |
| YMR116C                                  | YKL201C   | YCR046C                         | YMR271C   |
| YER081W                                  | YKL198C   | YDL083C                         | YNL037C   |
| YCR003W                                  | YJR129C   | YDL110C                         | YNL040W   |
| YER056C-A                                | YKR091W   | YDL134C                         | YNL041C   |
| YEL050C                                  | YKR087C   | YDL185W                         | YNL043C   |
| YKL074C                                  | YKR084C   | YDL188C                         | YNL044W   |
| YLR333C                                  | YKR101W   | YDL191W                         | YNL045W   |
| YOR185C                                  | YKL006W   | YDL224C                         | YNL046W   |

|           |         |           |         |
|-----------|---------|-----------|---------|
| YOL080C   | YKL156W | YDR025W   | YNL049C |
| YDR494W   | YKL056C | YDR152W   | YNL050C |
| YFR009W   | YGR271W | YDR179W-A | YNL051W |
| YNR022C   | YNL014W | YDR234W   | YNL052W |
| YJR145C   | YLR327C | YDR239C   | YNL096C |
| YPR043W   | YLR264W | YDR241W   | YNL284C |
| YLR192C   | YLR362W | YDR244W   | YNR041C |
| YLR303W   | YLR281C | YDR245W   | YNR052C |
| YAR018C   | YLR388W | YDR247W   | YOR158W |
| YHR077C   | YLR185W | YDR248C   | YOR197W |
| YGL232W   | YLR425W | YDR249C   | YOR202W |
| YKL081W   | YLR441C | YDR250C   | YOR202W |
| YLR335W   | YMR080C | YDR251W   | YOR202W |
| YMR302C   | YMR230W | YDR252W   | YOR202W |
| YPL048W   | YMR226C | YDR275W   | YOR208W |
| YPL079W   | YMR225C | YDR282C   | YOR209C |
| YER131W   | YMR020W | YDR293C   | YOR212W |
| YBR084C-A | YNL288W | YDR357C   | YOR213C |
| YKL204W   | YMR269W | YDR358W   | YOR214C |
| YGR178C   | YNL040W | YDR359C   | YOR215C |
| YJR150C   | YNL067W | YDR360W   | YOR216C |
| WT        | YNL063W | YDR363W   | YOR219C |
| YLL045C   | YNL304W | YDR363W-A | YOR221C |
| YLR344W   | YNL223W | YDR368W   | YOR313C |
| YOR293W   | YNL339C | YDR369C   | YOR314W |
| YBR130C   | YNL104C | YDR370C   | YOR315W |
| YML063W   | YML129C | YDR371W   | YOR316C |
| YIL052C   | YNL096C | YDR372C   | YOR317W |
| YCR031C   | YNL239W | YDR400W   | YOR318C |
| YLR406C   | YOR091W | YDR422C   | YOR320C |
| YLR039C   | YNR020C | YDR432W   | YOR321W |
| YDR515W   | YOR107W | YDR450W   | YOR322C |
| YER074W   | YNR045W | YDR500C   | YOR324C |
| YLR061W   | YOL093W | YEL015W   | YOR327C |
| YKL191W   | YOR051C | YER049W   | YPL009C |
| YML009C   | YOL027C | YER153C   | YPL013C |
| YMR143W   | YOL114C | YFR001W   | YPL127C |
| YOR182C   | YOL039W | YGL049C   | YPL197C |
| YDL037C   | YPL081W | YGL070C   | YPL203W |
| YIL133C   | YOR252W | YGR010W   | YPL226W |
| YDL184C   | YOR242C | YGR011W   | YPL239W |
| YMR129W   | YOR354C | YGR012W   | YPL240C |
| YDR502C   | YPL208W | YGR014W   | YPR014C |
| YPL106C   | YPL119C | YGR015C   | YPR028W |
| YDR116C   | YOR276W | YGR016W   | YPR057W |
| YKL068W   | YPL009C | YGR017W   | YPR075C |
| YLR325C   | YOR303W | YGR018C   | YPR076W |
| YLR398C   | YGL049C | YGR019W   | YPR077C |

|           |           |         |         |
|-----------|-----------|---------|---------|
| YOR312C   | YFL001W   | YGR021W | YPR078C |
| .YPR132W  | YPR111W   | YGR022C | YPR079W |
| YDL088C   | YBR267W   | YGR054W | YPR084W |
| YDL175C   | YBR261C   | YGR054W | YPR089W |
| YBR189W   | YDL001W   | YGR131W | YPR090W |
| YHR121W   | YDL130W-A | YGR132C | YPR092W |
| YMR171C   | YBR280C   | YGR133W | YPR093C |
| YGR276C   | YBR271W   | YGR134W | YPR095C |
| YER091C   | YCR021C   | YGR135W | YPR100W |
| YAL029C   | YDL048C   | YGR136W | YPR152C |
| YBL087C   | YCR059C   | YGR137W | YPR197C |
| YDR312W   | YCL011C   | YGR138C |         |
| YHR021C   | YDR198C   | YGR139W |         |
| YKL167C   | YDR333C   | YGR141W |         |
| YML026C   | YDR207C   | YGR142W |         |
| YOR133W   | YDR206W   | YGR148C |         |
| YPL198W   | YDR101C   | YHR010W |         |
| YPR132W   | YDR098C   | YHR086W |         |
| YFR031C-A | YDL210W   | YHR087W |         |
| YDL081C   | YDR225W   | YHR092C |         |
| YDL160C   | YDR117C   | YHR093W |         |
| YDL133C-A | YDL229W   | YHR094C |         |
| YNL087W   | YDR001C   | YHR095W |         |
| YJL051W   | YDR120C   | YHR096C |         |
| YJR137C   | YDR257C   | YHR097C |         |
| YNL323W   | YDR007W   | YHR103W |         |
| YBL072C   | YDR156W   | YHR104W |         |
| YGL031C   | YDR282C   | YHR105W |         |
| YHR203C   | YDR169C   | YHR202W |         |
| YLR107W   | YDR159W   | YHR203C |         |
| YOR017W   | YER151C   | YHR204W |         |
| YBR048W   | YEL011W   | YHR206W |         |
| YDL130W   | YFL023W   | YHR207C |         |
| YDR471W   | YFL034W   | YHR209W |         |
| YNL001W   | YER007C-A | YHR210C |         |
| YKR094C   | YER002W   | YIL001W |         |
| YOL121C   | YDR535C   | YIL002C |         |
| YLR434C   | YER035W   | YIL005W |         |
| YDR363W   | YGL208W   | YIL006W |         |
| YHR034C   | YFR015C   | YIL018W |         |
| YGL222C   | YGR053C   | YIL074C |         |
| YKL130C   | YGR081C   | YJL092W |         |
| YMR188C   | YGL173C   | YJL106W |         |
| YFR049W   | YGL043W   | YJL107C |         |
| YGL147C   | YHR047C   | YJL117W |         |
| YDL082W   | YGR173W   | YJL119C |         |
| YDL136W   | YHL034C   | YJL120W |         |
| YKL205W   | YIR009W   | YJL138C |         |

|           |           |         |
|-----------|-----------|---------|
| YMR190C   | YJL131C   | YJL151C |
| YBL079W   | YJR008W   | YJL152W |
| YIL079C   | YJL122W   | YJL153C |
| YGR148C   | YIL093C   | YJL154C |
| YLR048W   | YJL141C   | YJL155C |
| YOR234C   | YJL137C   | YJL177W |
| YOL041C   | YIL110W   | YJR034W |
| YPR129W   | YIL096C   | YJR043C |
| YJR047C   | YJL148W   | YJR047C |
| YOL115W   | YJL164C   | YJR048W |
| YLR448W   | YJL160C   | YJR049C |
| YJR148W   | YJL158C   | YJR050W |
| YDR382W   | YJL187C   | YJR066W |
| YGR214W   | YIL162W   | YKL003C |
| YKR026C   | YKR058W   | YKL127W |
| YNL302C   | YJR126C   | YKR036C |
| YPR042C   | YKL109W   | YKR039W |
| YIL071C   | YKR024C   | YKR040C |
| YIL103W   | YKL139W   | YKR041W |
| YPL183W-A | YKL166C   | YKR042W |
| YKL001C   | YLR343W   | YKR043C |
| YDR385W   | YLR221C   | YKR044W |
| YGR072W   | YLR003C   | YKR045C |
| YKR057W   | YLR262C-A | YKR046C |
| YLR367W   | YLR258W   | YKR047W |
| YNL301C   | YLR137W   | YKR048C |
| YPL220W   | YLR150W   | YLL028W |
| YOR302W   | YLR149C   | YLL029W |
| YIL148W   | YLR289W   | YLL032C |
| YDL061C   | YMR186W   | YLL038C |
| YER176W   | YML007W   | YLL039C |
| YOL137W   | YML109W   | YLL040C |
| YJL124C   | YML028W   | YLL041C |
| YCL009C   | YMR139W   | YLL042C |
| YBR057C   | YNL141W   | YLL043W |
| YJL176C   | YNL255C   | YLL044W |
| YMR307W   | YNL031C   | YLL045C |
| YEL048C   | YMR247C   | YLR296W |
| YJL095W   | YNL300W   | YLR297W |
| YKR020W   | YMR282C   | YLR299W |
| YNL171C   | YMR273C   | YLR300W |
| YOR115C   | YNL197C   | YLR303W |
| YPL069C   | YNL307C   | YLR306W |
| YOL006C   | YNL081C   | YLR307W |
| YOR028C   | YMR297W   | YLR309C |
| YPR030W   | YNL229C   | YLR311C |
| YBR030W   | YNL227C   | YLR312C |
| YBR026C   | YNL224C   | YLR313C |

|         |         |         |
|---------|---------|---------|
| YBL024W | YNR048W | YLR401C |
| YBR034C | YOR035C | YLR402W |
| YAL040C | YOL001W | YLR404W |
| YBR064W | YOL114C | YLR405W |
| YBR062C | YOR083W | YLR406C |
| YBR186W | YOR078W | YLR407W |
| YBR185C | YOL031C | YLR408C |
| YBL104C | YPL052W | YLR410W |
| YBR222C | YPL157W | YLR412W |
| YBR010W | YPL067C | YLR413W |
| YBR009C | YPL184C | YLR414C |
| YBL003C | YBR232C | YLR441C |
| YCR071C | YBR240C | YML112W |

**Table S2. List of negative genetic interactions (nGIs) for *DBP7* and *YRF1-6* (no LiCl in media).**

| SGA hits for <i>DBP7</i> | SGA hits for <i>YRF1-6</i> |
|--------------------------|----------------------------|
|                          | TMA64                      |
| CLU1                     | BUD27                      |
| RSM28                    | TIF4632                    |
| HCR1                     | CAF20                      |
| SCD6                     | YGR054W                    |
| ANB1                     | PCI8                       |
| GCN3                     | YIH1                       |
| EBS1                     | SLH1                       |
| SHE3                     | PUF6                       |
| PUF6                     | SGN1                       |
| SLH1                     | SIP4                       |
| SGN1                     | EDC3                       |
| SIP4                     | SHE3                       |
| RPL16B                   | SRO9                       |
| RPP2A                    | RPP1B                      |

|  |       |
|--|-------|
|  | TMA10 |
|--|-------|

**Table S3. List of conditional negative genetic interactions (nGIs) for *DBP7* and *YRF1-6* (LiCl treatment).**

| <b>Conditional nGI hits for <i>DBP7</i></b> | <b>Conditional nGI hits for <i>YRF1-6</i></b> |
|---------------------------------------------|-----------------------------------------------|
| PDE1                                        | ZDS1                                          |
| BCK1                                        | MRN1                                          |
| TAE1                                        | SRO9                                          |
| DTD1                                        | EFT1                                          |
| NAM7                                        | PSK1                                          |
| CTK1                                        | FMS1                                          |
| XRN1                                        | GBP2                                          |
| MRN1                                        | SLF1                                          |
| SRO9                                        | POP2                                          |
| GBP2                                        | EDC1                                          |
| CTK3                                        | EDC2                                          |
| DBP1                                        | GIS2                                          |
| EAP1                                        | SSD1                                          |
| GIS2                                        | DBP1                                          |
|                                             | CTK3                                          |
